# Supplementary material
Source: HighWire-hosted journal article supplement (https://erj.ersjournals.com/highwire/filestream/113169/field_highwire_adjunct_files/0/CME_34-6.pdf)
Supplement: CME_34-6.pdf [file CME_34-6.pdf]

# CME Credit Application Form

## (1 CME credit)

To receive CME credits, read the CME article in this issue, indicate the correct responses to the educational questions below and complete the requested information overleaf in full. This form is also available in electronic format at [www.erj.ersjournals.com/current.dtl](http://www.erj.ersjournals.com/current.dtl). To return your application, you can either:

➤ use this form and return it completed to ERSJ Ltd, 442 Glossop Road, Sheffield, S10 2PX, UK; fax to +44-114-2665064; or e-mail to [info@ersj.org.uk](mailto:info@ersj.org.uk)

➤ fill in the online form at [www.erj.ersjournals.com/current.dtl](http://www.erj.ersjournals.com/current.dtl)

Certificates will be e-mailed to the address filled in overleaf. Please allow 4 weeks for processing.

There is now a charge for CME credit applications. For £30 you can make six attempts at the educational questions in issues of the *ERJ*. The charge will apply to each application, whether or not the CME credit is awarded. When you have paid, a reference number will be issued. Please enter your reference number in section 2 if you have already paid, or fill in your credit card details in section 3 if you have not paid. Note that your application for CME credits will not be processed until payment is received in full.

### 1. Educational questions. Answer by marking the correct answer.

#### 1. Which of the following statements regarding trichloramine is false?

It is a volatile disinfection by-product with irritant properties.  It accumulates in the air of indoor swimming pools.  The WHO recommends not to exceed the value of  $0.5 \text{ mg} \cdot \text{m}^{-3}$  in swimming pool air.  The levels found in this study were higher than observed in previous published studies.

#### 2. Which of the following sentences on swimming pool attendance is false?

Almost all children in the study had ever attended a swimming pool.  Around 20% of children had regularly attended swimming pools during the summer and winter in the last year.  Swimming pool attendance differed by sex but not by parental socioeconomic position.  Chlorinated pool attendance was more common than brominated pool attendance.

#### 3. Which of the following health outcomes was found to be positively associated with swimming pool attendance?

Asthma.  Rhinitis symptoms.  Allergic rhinitis symptoms.  Eczema.

#### 4. Which of the following reasons is not a likely explanation for the observed protective effect of swimming pool attendance on respiratory health?

Benefit of physical activity during swimming.  Residual confounding by other physical activity.  Reverse causation: those with symptoms avoid swimming.  Protective respiratory effect of trichloramine exposure.

#### 5. Which of the following limitations would be improved if the study was repeated with a longitudinal design?

Potential reverse causation.  Sample size.  Potential misclassification.  Response rate.

Please turn the page and fill in your details

# CME Credit Application Form (continued)

## 2. Applicant personal details.

Reference No: ..... ERS Membership No. (if known): .....

Date of Birth (DD/MM/YYYY): .....

Family Name: ..... First Name: .....

Mailing Address: .....

.....

Postal Code: ..... City: ..... Country: .....

Telephone: + ..... E-mail: .....

## 3. Payment details.

I agree for payment of £30 (pounds sterling) to be taken from my credit card (MasterCard and Visa only). Details are as follows:

Card Type: MasterCard / Visa (please circle) Cardholder Name: .....

Cardholder Number: .....

Start date: ..... Expiry date: .....

\*CV2 No: ..... Signature: .....

Cardholder Address: .....

(if different from above address)

\*CV2 No: this is the number on the back of your card - without this number we are unable to process payments through the system

Unfortunately, we cannot accept payment by American Express. For payment enquiries, please speak to Joanne Abdy at the ERSJ Ltd Accounts Department: tel: +44 114 2672862; e-mail: joanne.abdy@ersj.org.uk

VAT No. 534 1778 39 Registered in England with Company Registration No. 2655805
